# Supplementary material for: NiOx-Fe2O3-coated p-Si photocathodes for enhanced solar water splitting in neutral pH water
Source: Royal Society of Chemistry journal article supplement (doi:10.1039/c4nr07074g), 2015-01-01
Supplement: c4nr07074g1.pdf [file c4nr07074g1.pdf]

## Supplementary Information

### **NiO<sub>x</sub>-Fe<sub>2</sub>O<sub>3</sub>-coated p-Si photocathodes for enhanced solar water splitting in neutral pH water**

**Alireza Kargar,<sup>a</sup> Justin S. Cheung,<sup>a</sup> Chin-Hung Liu,<sup>bc</sup> Tae Kyoung Kim,<sup>bc</sup> Conor T. Riley,<sup>d</sup> Shaohua Shen,<sup>e</sup> Zhaowei Liu,<sup>a</sup> Donald J. Sirbuly,<sup>d</sup> Deli Wang<sup>abf</sup> and Sungho Jin<sup>\*bc</sup>**

\*Corresponding author: jin@ucsd.edu

## Optical absorption measurement:

Absorption measurements were obtained using a 150 mm integrating sphere connected to a LAMBDA 1050 UV/Vis/NIR spectrophotometer. Since the silicon transmittance (T) was found to be zero (Fig. S1a), the absorption (A) was calculated using;  $A(\%) = 100 - R(\%)$  (R: reflectance). Fig. S1b shows the absorption spectra of bare and metal-oxide-coated Si substrates.

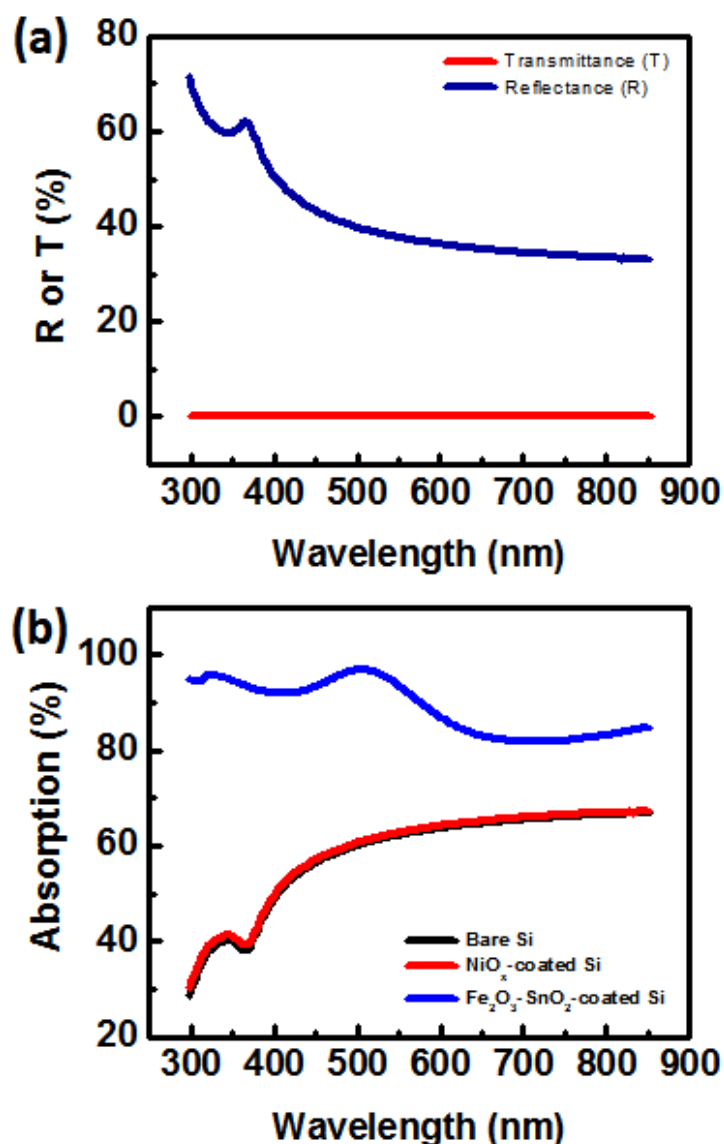

**Fig. S1** (a) Transmittance and reflectance spectra of bare Si substrate. (b) Absorption spectra of bare and metal-oxide-coated Si substrates.

### **p-Si/n-SnO<sub>2</sub>/n-Fe<sub>2</sub>O<sub>3</sub> heterojunction band diagram:**

The band gap of SnO<sub>2</sub> layer sputtered at a RF power of 400 W at room temperature was measured resulting in a band gap of 3.37 eV. The considered Si and Fe<sub>2</sub>O<sub>3</sub> band gaps were 1.11 eV and 2.1 eV, respectively. To simulate the band diagram, the thicknesses of the Fe<sub>2</sub>O<sub>3</sub> nanorod (NR) film and the SnO<sub>2</sub> seeding layer were considered as 141 nm and 82 nm, respectively, as measured for the sample using the SEM imaging (see the text). The electron affinities for Si, SnO<sub>2</sub>, and Fe<sub>2</sub>O<sub>3</sub> were considered as 4.05 eV, ~4.8 eV,<sup>1,2</sup> and ~4.7 eV,<sup>1</sup> respectively. The doping concentration of p-Si is in the range of  $6.7 \times 10^{14}$ – $1.5 \times 10^{16}$  cm<sup>-3</sup> based on its resistivity of 1–20 Ωcm, and of sputtered SnO<sub>2</sub> is in range of  $10^{19}$  cm<sup>-3</sup>.<sup>3</sup> The effect of electrolyte pH was considered in the band diagram using the Nernst equation;

$$E(\text{H}^+/\text{H}_2) = -0.059 \times \text{pH} \quad (\text{V vs NHE}) \quad (1)$$

where  $E(\text{H}^+/\text{H}_2)$  is the Nernstian (thermodynamic) potential for hydrogen evolution (water reduction). Fig. S2 shows the approximate energy band diagram of the p-Si/n-SnO<sub>2</sub>/n-Fe<sub>2</sub>O<sub>3</sub> heterojunction at equilibrium condition and at dark for an electrolyte pH of 7.1 which was simulated using SCAPS (version 3.1.02) numerical simulation software.

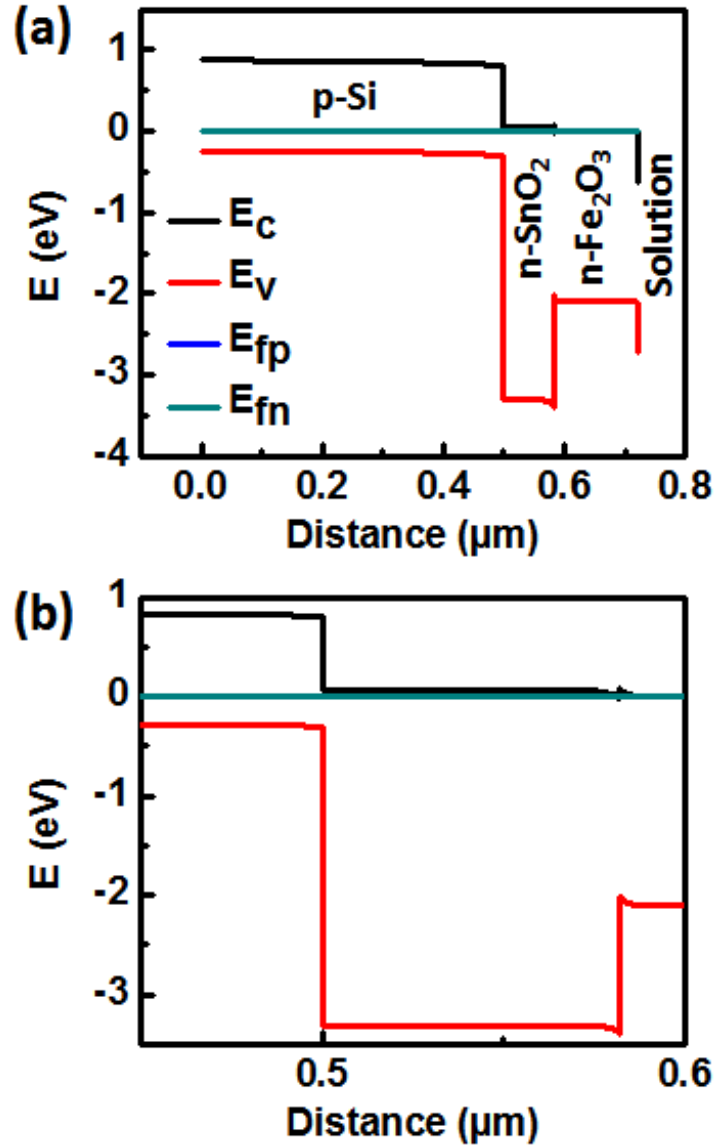

**Fig. S2** (a) Approximate simulated energy band diagram of p-Si/n-SnO<sub>2</sub>/n-Fe<sub>2</sub>O<sub>3</sub> heterojunction at equilibrium condition and at dark for an electrolyte pH of 7.1. The considered thickness for planar Si substrate was 500 nm in the simulation. E<sub>c</sub>, E<sub>v</sub>, E<sub>fp</sub>, and E<sub>fn</sub> are conduction band, valance band, hole Fermi level, and electron Fermi level, respectively. Note that E<sub>fp</sub> and E<sub>fn</sub> overlap each other after alignment of energy levels. Energy levels are plotted with reference to vacuum level. Four different regions including p-Si, n-SnO<sub>2</sub>, n-Fe<sub>2</sub>O<sub>3</sub>, and solution are labeled in (a). (b) Zoomed-in band diagram around p-Si/n-SnO<sub>2</sub> and n-SnO<sub>2</sub>/n-Fe<sub>2</sub>O<sub>3</sub> junctions.

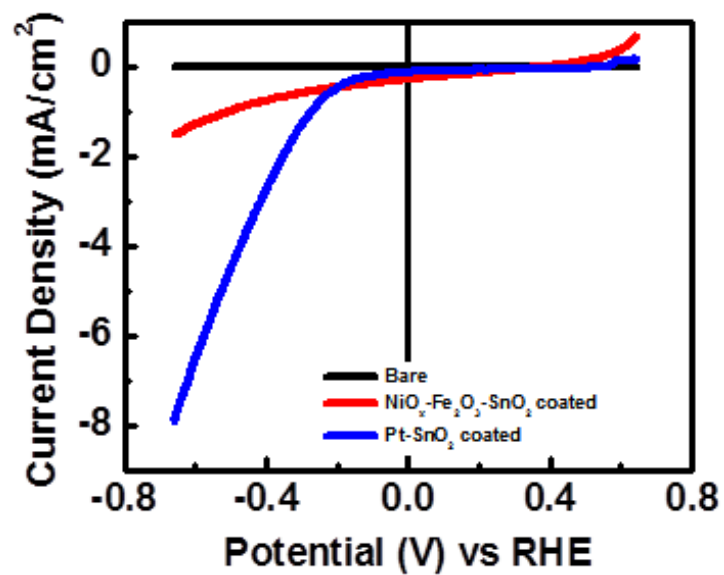

**Fig. S3** Current density under illumination of bare and NiO<sub>x</sub>-Fe<sub>2</sub>O<sub>3</sub>-SnO<sub>2</sub>-coated p-Si photocathodes in comparison to Pt-SnO<sub>2</sub>-coated p-Si photocathode measured in the neutral pH water. This figure is re-plotted of Fig. 4b (in the main text) in full scanned potential range to see the difference in current densities at high reversed biasing potentials.

## References

1. M. Grätzel, *Nature*, 2001, **414**, 338-344.
2. Y. Cheng, R. Yang, J.-P. Zheng, Z. L. Wang and P. Xiong, *Mater. Chem. Phys.*, 2012, **137**, 372-380.
3. B. S. Tosuna, R. K. Feist, A. Gunawan, K. A. Mkhoyan, S. A. Campbell and E. S. Aydil, *Thin Solid Films*, 2012, **520**, 2554-2561.
